# Supplementary material
Source: publisher figshare collection journal article supplement (https://springernature.figshare.com/ndownloader/files/17476607)
Supplement: Supplementary file 1 [file 17476607]

**Supporting Information**

Biomarker records and mineral compositions of the Messinian K–Mg salts from Sicily

Yuta Isaji1*, Toshihiro Yoshimura1, Junichiro Kuroda2, Yusuke Tamenori3,

Francisco J. Jiménez-Espejo1,4, Stefano Lugli5, Vinicio Manzi6, Marco Roveri6,

Hodaka Kawahata2, Naohiko Ohkouchi1

1 Biogeochemistry Program, Japan Agency for Marine-Earth Science and Technology (JAMSTEC), 2-15, Natsushima, Yokosuka 237-0061, Japan (*correspondence: isajiy@jamstec.go.jp, 046-867-9810)

2Atmosphere and Ocean Research Institute, University of Tokyo, 5-1-5 Kashiwanoha, Kashiwa, Chiba 277-8564, Japan

3Japan Synchrotron Radiation Research Institute/SPring-8, 1-1-1 Kouto, Sayo, Hyogo 679-5198, Japan

4The Andalusian Earth Sciences Institute, The Spanish Research Council and the Univeristy of Granada, Avda de las Palmeras 4, 18100 Armilla, Spain

5Dipartimento di Scienze Chimiche e Geologiche, Università degli Studi di Modena e Reggio Emilia, Via Campi 103, 41125 Modena, Italy

6Physics and Earth Science Department, University of Parma, Parco Area delle Scienze 157/A, 43124 Parma, Italy


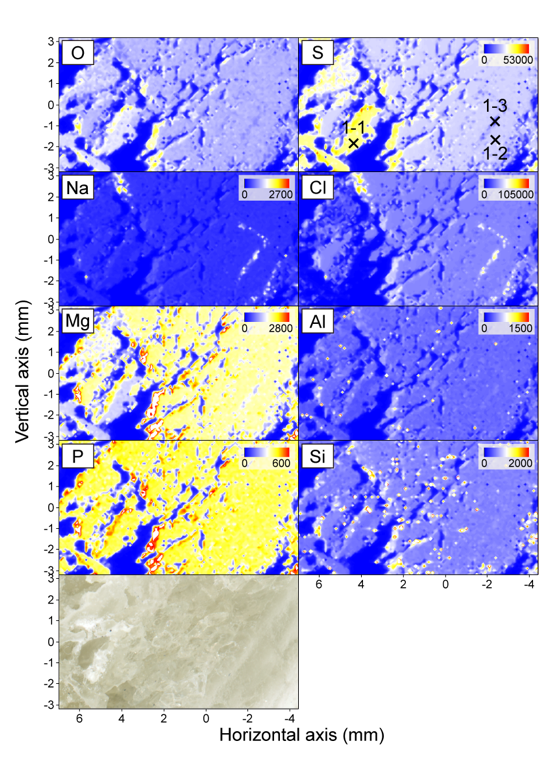


Fig. S1. The µ-XRF intensity maps of O, S, Na, Cl, Mg, Al, P, and Si, together with the picture of the measured area in K-1. Color scales indicate element concentrations in signal counts per second. Black crosses in the µ-XRF intensity map of S denote µ-XANES measurement points.


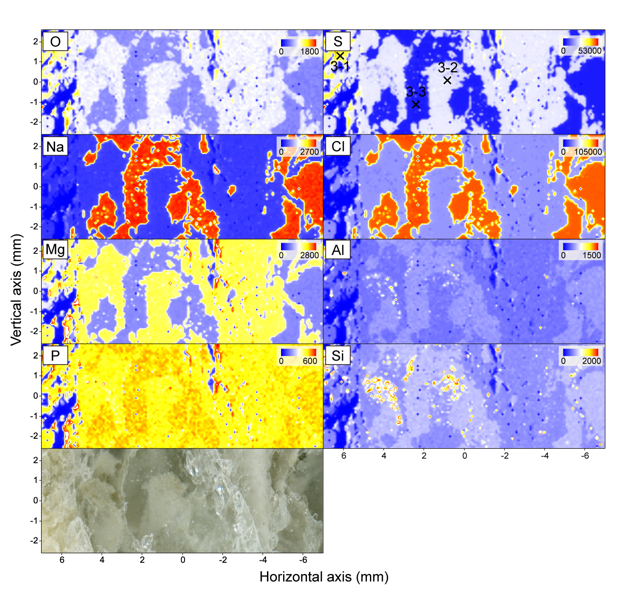


Fig. S2. The µ-XRF intensity maps of O, S, Na, Cl, Mg, Al, P, and Si, together with the picture of the measured area in K-3. Color scales indicate element concentrations in signal counts per second. Black crosses in the µ-XRF intensity map of S denote µ-XANES measurement points.

Fig. S3. The XRD spectra of spot 2-1, 2-2, and 2-3, together with the reference spectra of halite, kainite, and leonite. The presence of kainite peaks in spot 2-1 is probably due to contamination of kainite during the sampling by dental drill, because halites only occur as small crystals, making the sampling procedure difficult.


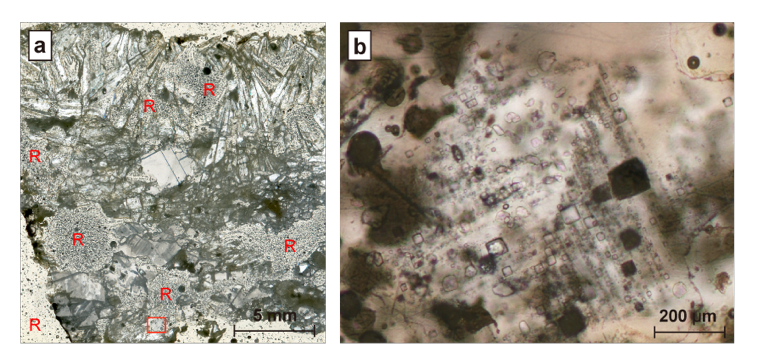


Fig. S4. (a) Thin section of K-2 under transmitted light. Area filled with resin is indicated as R. (b) Close-up of the red rectangle showing fluid inclusion bands in a halite crystal.
